# Supplementary material
Source: Springer Nature journal article supplement (https://www.springermedizin.de/resource/supplementary/12879_2008_772_MOESM1_ESM.pdf/9449890)
Supplement: MOESM1 [file 9449890]

**CTX-M universal primer**

3' to 5'direction (reverse)

5' to 3'direction (forward)

**CTX-M-U1.SE**

5'-ATGTGCAGTACCAGTAARGTKATGGC-3'

**CTX-M-U2.AS**

3'-GGCGACYAAGACCASTGRATRAARTGGGT-5'

5'-CCGCTGRTTCTGGTSACYTAYTTTACCCA-3'

**A**

|                        |          | nucleotide |      |                         |           | nucleotide                          |      |
|------------------------|----------|------------|------|-------------------------|-----------|-------------------------------------|------|
|                        |          | Position   |      |                         |           | position                            |      |
| <i>E. coli</i>         | CTX-M-1  | X92506     | 273  | 5'-ATGTGCAGTACCAGTAAAGT | GATGGC-3' | 5'-CCGCTGATTCTGGTCACTTACTTCACCCA-3' | 865  |
| <i>S. typhimurium</i>  | CTX-M-2  | X92507     | 216  | -----T-----G-----       |           | -----G-----G-C-----T-----           | 808  |
| <i>C. freundii</i>     | CTX-M-3  | Y10278     | 211  | -----T-----G-----       |           | -----G-----G-C-----T-----           | 803  |
| <i>C. amalonaticus</i> | CTX-M-8  | AF189721   | 484  | -----T-----G-----       |           | -----T-----G-----G-C-----T-----     | 1076 |
| <i>E. coli</i>         | CTX-M-9  | AF174129   | 6546 | -----T-----T-----       |           | -----G-----G-C-----T-----T-----     | 7138 |
| <i>E. coli</i>         | CTX-M-15 | AY044436   | 1646 | -----T-----G-----       |           | -----G-----G-C-----T-----           | 2238 |
| <i>E. coli</i>         | CTX-M-25 | AF518567   | 2531 | -----T-----G-----       |           | -----CG-----G-----T-----            | 3123 |
| <i>E. coli</i>         | CTX-M-28 | AJ549244   | 211  | -----T-----G-----       |           | -----CG-----G-----T-----            | 803  |

**B**

|                   |          |          |     |                   |  |                           |     |
|-------------------|----------|----------|-----|-------------------|--|---------------------------|-----|
| <i>K. oxytoca</i> | CTX-M-3  | AB185840 | 211 | -----T-----G----- |  | -----G-----G-C-----T----- | 803 |
|                   | CTX-M-35 | AB176534 | 211 | -----T-----G----- |  | -----G-----G-C-----T----- | 803 |

**C**

|                        |       |          |      |                              |  |                                      |      |
|------------------------|-------|----------|------|------------------------------|--|--------------------------------------|------|
| <i>K. oxytoca</i>      | K1    | AY077482 | 372  | -----G-----G-----            |  | -----G-G-----G-C-----T-----T-----    | 964  |
|                        |       | AY077483 | 390  | -----G-----G-----            |  | -----G-G-----G-C-----T-----T-----    | 982  |
|                        |       | AY077484 | 389  | -----G-----G-----            |  | -----G-G-----G-C-----T-----T-----    | 981  |
|                        |       | AY077486 | 391  | -----G-----G-----            |  | -----G-G-----G-C-----T-----T-----    | 983  |
|                        |       | AY077485 | 391  | -----G-AT-A-----C-----T----- |  | -----G-AT-A-----C-----T-----T-----   | 983  |
|                        |       | AY077487 | 384  | -----G-AT-A-----C-----T----- |  | -----G-AT-A-----C-----T-----T-----   | 976  |
|                        |       | AY077488 | 366  | -----G-AT-A-----C-----T----- |  | -----G-AT-A-----C-----T-----T-----   | 958  |
|                        |       | AY077489 | 356  | -----G-AT-A-----C-----T----- |  | -----G-AT-A-----C-----T-----T-----   | 948  |
|                        |       | AF473577 | 391  | -----AT-A-----C-----T-----   |  | -----AT-A-----C-----T-----T-----     | 983  |
|                        |       | AY055205 | 389  | -----G-AT-A-----C-----T----- |  | -----G-AT-A-----C-----T-----T-----   | 981  |
| <i>K. oxytoca</i>      | Oxy-1 | Y17715   | 357  | -----G-----G-----            |  | -----G-G-C-----G-C-----T-----T-----  | 949  |
|                        |       | Y17714   | 351  | -----G-----G-----            |  | -----G-AT-A-----C-----T-----T-----   | 943  |
|                        |       | AF491278 | 385  | -----T-G-----G-----          |  | -----G-AT-A-----C-----T-----T-----   | 977  |
|                        |       | AY077481 | 393  | -----G-----G-----            |  | -----G-G-A-----G-C-----T-----T-----  | 985  |
|                        |       | AJ871872 | 208  | -----G-----G-----            |  | -----G-G-----G-C-----T-----T-----    | 800  |
|                        |       | AJ871879 | 211  | -----G-----G-----            |  | -----G-GT-A-----G-C-----T-----T----- | 803  |
| <i>C. sedlakii</i>     | Sed-1 | AF321608 | 223  | -----G-----G-C-----A-----    |  | -----G-G-----A-C-----T-----A-----    | 815  |
| <i>C. amalonaticus</i> | CdiA  | X62610   | 385  | -----T-----GAC-----T-----    |  | -----C-C-----C-----T-----A-----      | 977  |
| <i>C. koseri</i>       | CKO-1 | AF477396 | 264  | -C-C-A-TGA--G-G-C-C----      |  | --TT-C-CG--T-TC-TA-T-A--             | 818  |
| <i>P. vulgaris</i>     | K1    | D29982   | 428  | --GCA-T--A--G--T-----        |  | --AT-A--T-A--GT--T--A--              | 1020 |
| <i>P. vulgaris</i>     | CumA  | X80128   | 1475 | --GCA-T--A--G--T-----        |  | --AT-A--T-A--GTCT--T--A--            | 2067 |
| <i>P. penneri</i>      | HugA  | AF324468 | 1431 | --GCA-T--A--G--T-----        |  | --AT-A--T-A--GT--T--T--A--           | 2023 |
